# Supplementary material
Source: HighWire-hosted journal article supplement (https://cmaj.ca/highwire/filestream/59026/field_highwire_adjunct_files/1/canheart-tu-2-at.pdf)
Supplement: canheart-tu-2-at.pdf [file canheart-tu-2-at.pdf]

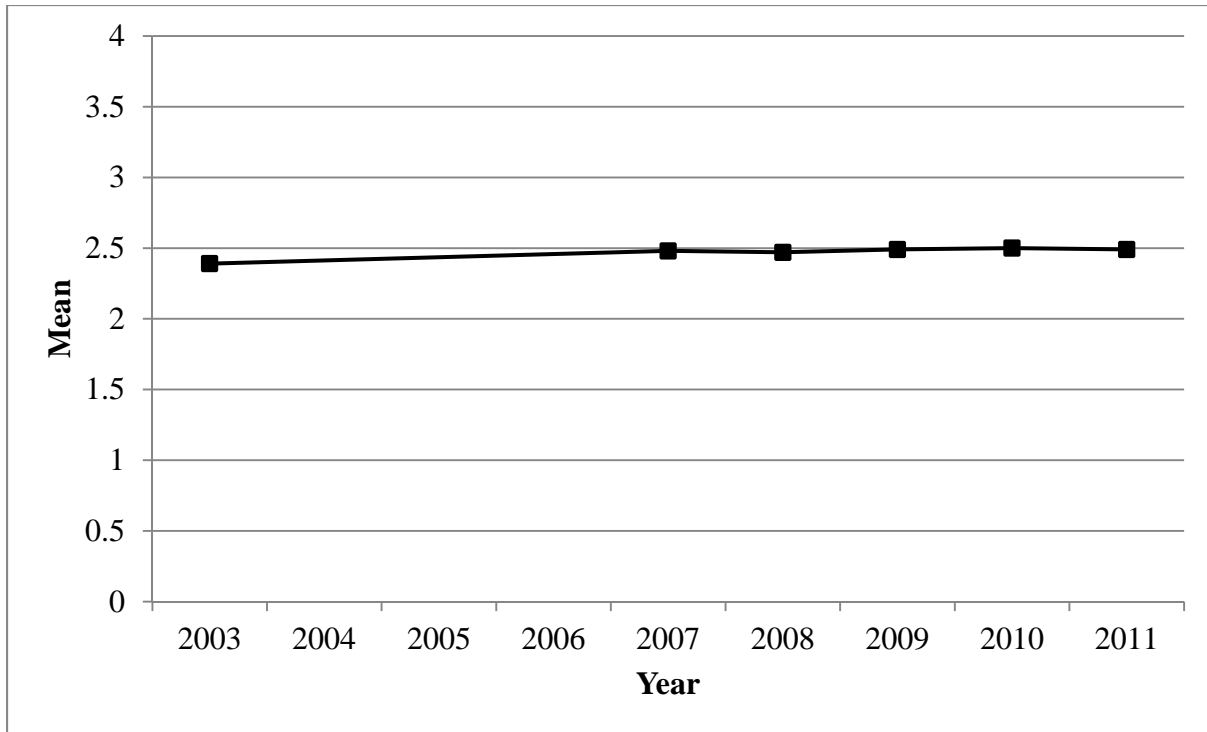

**Appendix 2 (as supplied by authors):** Mean CANHEART health index score among Canadian youth age 12 to 19, Canadian Community Health Survey 2003-2011.
